# Supplementary material for: Metabolic Syndrome Severity and All-Cause Mortality in a Nationally Representative Cohort of Older Chinese Adults
Source: Research Square preprint supplement (doi:10.21203/rs.3.rs-8644075/v1), 2026-02-09
Supplement: Supplementary file 1 [file 05051341bc0aa1540fcaec9e.docx]

Supplementary table 1. Model fitting results for Confirmatory Factor Analysis

|  | Model Fit Indices | Cut-off for good fit | Results |
| --- | --- | --- | --- |
| CMIN | 18.803 |  |  |
| SRMR | 0.020 | <0.08 | good |
| GFI | 0.997 | ≥0.95 | good |
| CFI | 0.956 | ≥0.90 | good |
| NFI | 0.942 | ≥0.95 | acceptable |
| RMSEA | 0.008 | <0.08 | good |

CMIN, Chi-square minimum; SRMR, Standardized Root Mean Square Residual; GFI, Goodness of Fit Index; CFI, Comparative Fit Index; NFI, Bentler-Bonett Normed Fit; RMSEA, Root Mean Square Error of Approximation.
